# Supplementary material
Source: PubMed Central journal article supplement (PMC7966321)
Supplement: 3150_materials.pdf [file 3150_materials.pdf]

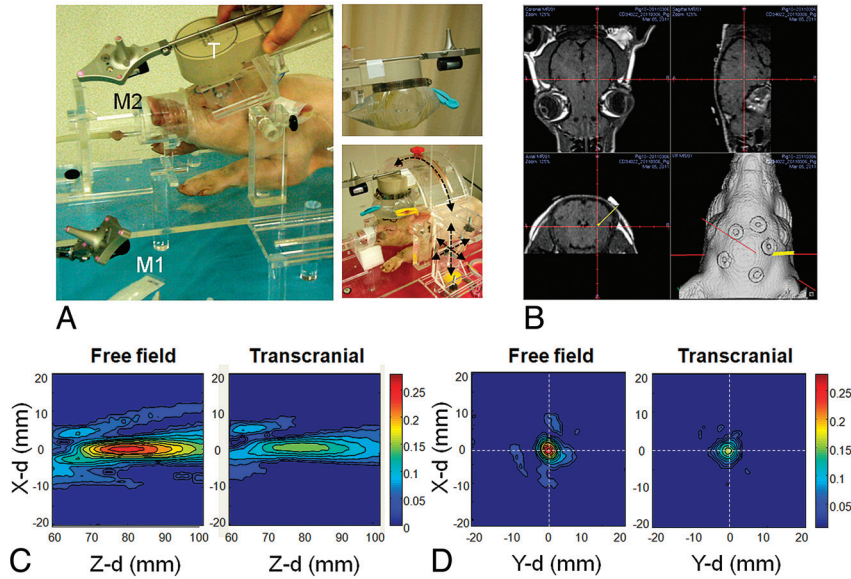

**On-line Fig 1.** *A*, Experimental setup showing the neuronavigation system registration of the focal point position of the FUS transducer on the neuronavigation system. M1/M2 indicate markers providing spatial reference for the neuronavigation system; T indicates FUS transducer. *B*, Images from the neuronavigation screens showing interactive positional changes of the FUS focal beam (red) to the planned target position (yellow). *C* and *D*, Free-field measured and transcranially measured pressure distributions of the applied FUS along the transducer's axis (left) and along the cross-sectional direction (right). The pressure decay (calculated as the fractional loss of pressure measured before and after skull insertion) was found to be approximately 30% after FUS energy penetrated through the swine skull; however, no focal beam shift was observed along the cross-sectional direction.

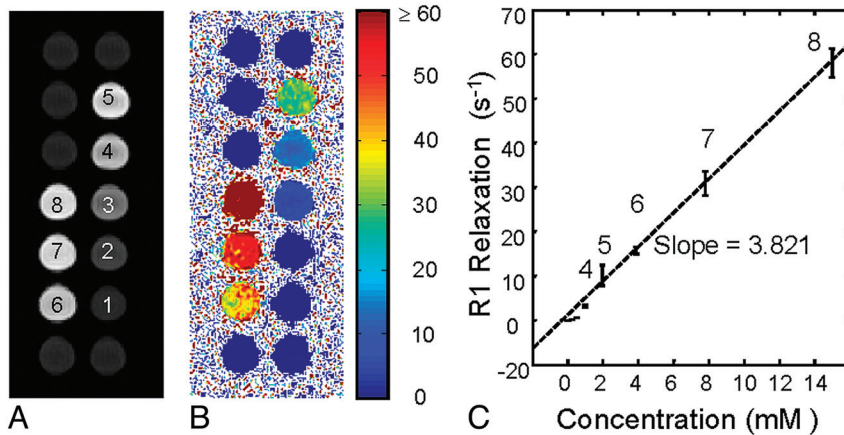

**On-line Fig 2.** MR in vitro relaxometry of Gd-DTPA for imaging-concentration correlation. *A*, T1-weighted images of the samples; *B*, R1 mapping of the samples; *C*, relationship of longitudinal relaxation ( $R_1$ , in seconds<sup>-1</sup>) versus Gd-DTPA concentration (in mM). Linear fit was obtained between the gadolinium ion concentration and  $R_1$ . A  $R_1$  relaxivity of 3.821 was estimated. Gd-DTPA concentration in numbered wells in panel *A*: (1): 0 mmol/L (2); 0.24 mmol/L (3); 0.49 mmol/L (4); 0.97 mmol/L (5); 1.96 mmol/L (6); 3.9 mmol/L (7); 7.8 mmol/L (8); 15 mmol/L. The other wells of the cell-culture dish were filled with degassed water.

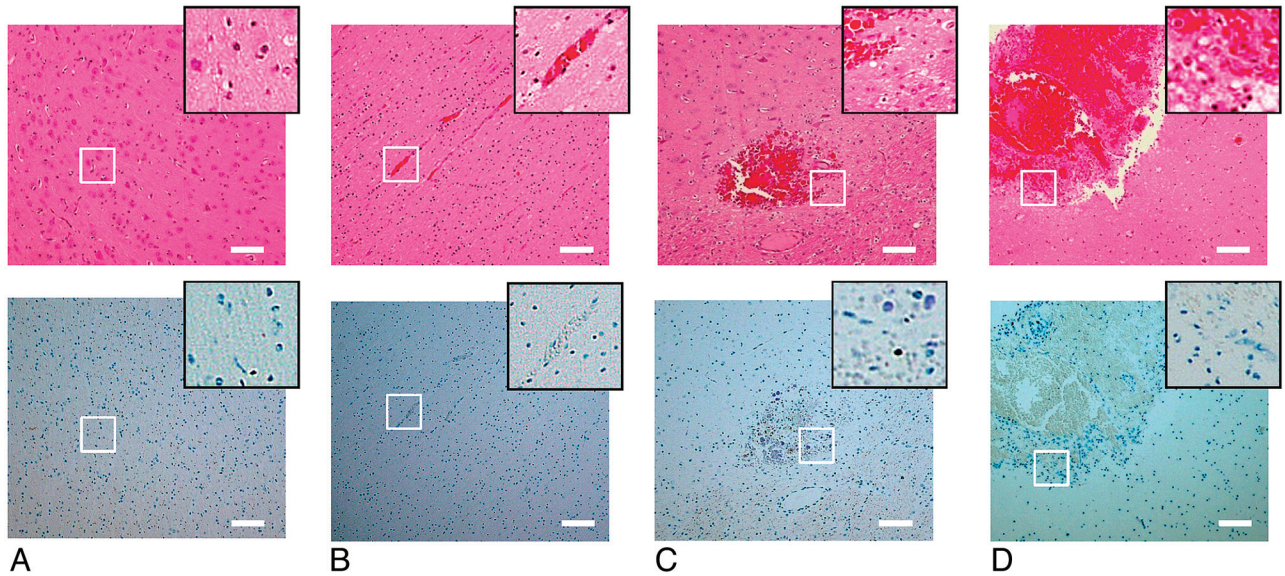

**On-line Fig 3.** H&E-stained (*upper panel*) and TUNEL-stained (*lower panel*) brain sections characterized as different hemorrhagic damage levels. *A*, grade 0: no damage; grade I: no damage but with temporal vasodilations (*B*); grade II: small groupings of erythrocyte extravasations (*C*); grade III: extensive erythrocyte extravasations or perivascular hemorrhages (*D*). Bar = 100  $\mu$ m.

**On-line Table 1. Summary of animal experiments**

| Group | Pressure (MPa) | Single/Multiple <sup>a</sup> | Animal No. | Sonication No.       | Histology No. | First MRI (before FUS) | Second MRI (after FUS) |
|-------|----------------|------------------------------|------------|----------------------|---------------|------------------------|------------------------|
| 1     | 0.26           | Single                       | 5          | 8 <sup>b</sup>       | 4             | T1                     | T1/T2/SWI/R1           |
| 2     | 0.43           | Single                       | 9          | 12 (2 <sup>c</sup> ) | 8             | T1                     | T1/T2/SWI/R1           |
| 3     | 0.56           | Single                       | 9          | 16                   | 8             | T1                     | T1/T2/SWI/R1           |
| 4     | 0.43           | Multiple                     | 6          | 6 <sup>b</sup>       | 4             | T1                     | T1/T2/SWI/R1           |
| Total |                |                              | 29         | 42                   | 24            |                        |                        |

<sup>a</sup> Single-point FUS sonication (single) or 3 × 3 points FUS sonication (multiple).

<sup>b</sup> The positional discrepancy between the actual BBB-opened location and the target position was not measured for 0.26-MPa FUS exposures.

<sup>c</sup> Two of the 12 animals were sacrificed immediately after the diagnostic MRI session for Gd-DTPA quantification via ICP-OES assay.

**On-line Table 2. Summary of histologic examination**

| Pressure (MPa) | Single/Multiple <sup>a</sup> | Grade Occurrence <sup>b</sup> |           |          |         | Sample No. (Animal No.) |
|----------------|------------------------------|-------------------------------|-----------|----------|---------|-------------------------|
|                |                              | 0                             | 1         | 2        | 3       |                         |
| 0.26           | Single                       | 182/82.7%                     | 36/16.4%  | 2/0.9%   | 0/0.0%  | 220 (4)                 |
| 0.43           | Single                       | 268/60.9%                     | 134/30.5% | 38/8.6%  | 0/0.0%  | 440 (8)                 |
| 0.56           | Single                       | 391/60.1%                     | 174/26.8% | 65/10.0% | 20/3.1% | 650 (8)                 |
| 0.43           | Multiple                     | 125/40.3%                     | 105/33.9% | 60/19.4% | 20/6.4% | 410 (4)                 |
| Total          |                              | 966/56.1%                     | 449/26.1% | 165/9.5% | 40/2.3% | 1720 (24)               |

<sup>a</sup> Single-point FUS sonication (single) or 3 × 3 points FUS sonication (multiple).

<sup>b</sup> Grade 0 = no histologic changes compared with normal tissues; grade 1 = no damage, some capillary vasodilations observed; grade 2 = capillary vasodilations accompanied with few erythrocyte extravasations; grade 3 = larger degree of erythrocyte extravasations.
